# Supplementary material for: Ammonium phosphomolybdate: a material for dielectric crossover and resistive switching performance
Source: Royal Society of Chemistry journal article supplement (doi:10.1039/d0na00481b), 2020-01-01
Supplement: d0na00481b1.pdf [file d0na00481b1.pdf]

## Supplementary Information

### Ammonium phosphomolybdate: A Material for Dielectric Crossover and Non-Volatile Resistive Switching Performances

Sarit K Ghosh, Venketa K Perla, Kaushik Mallick and Tarasankar Pal\*

Department of Chemical Sciences, University of Johannesburg, P.O. Box 524, Auckland Park 2006, Kingsway Campus South Africa

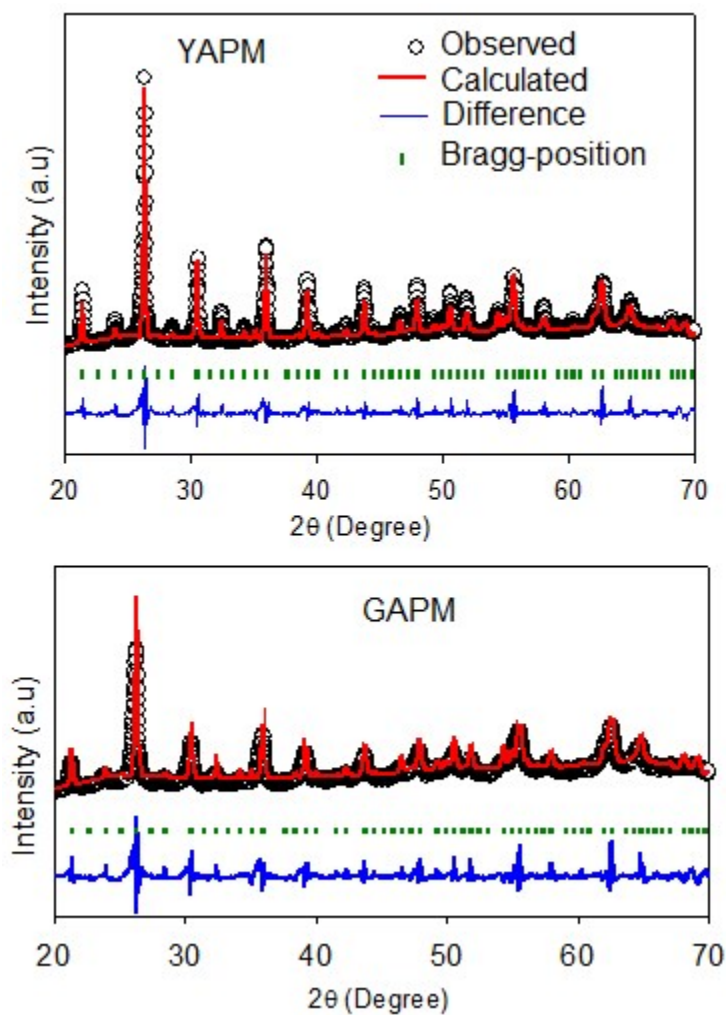

**Figure S1.** Rietveld refinement plots of YAPM and GAPM materials.

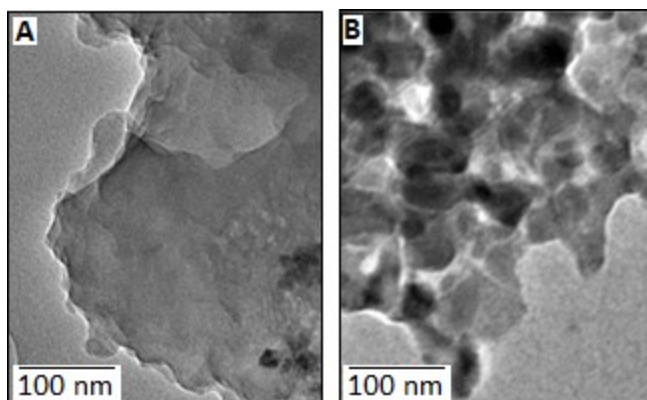

**Figure S2.** Transmission Electron Microscopy (TEM) images of YAPM (A) and GAPM (B)

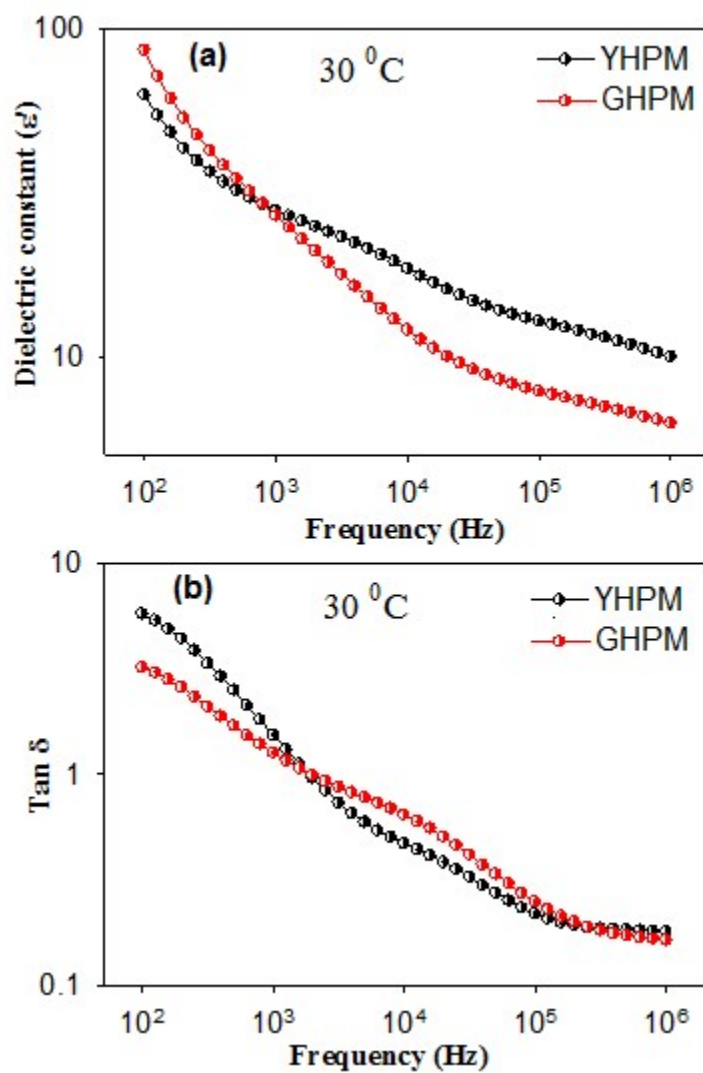

**Figure S3.** Room temperature (a) dielectric constant ( $\epsilon'$ ) and (b) dielectric loss tangent ( $\tan \delta$ ) curves of YHPM and GHPM materials.

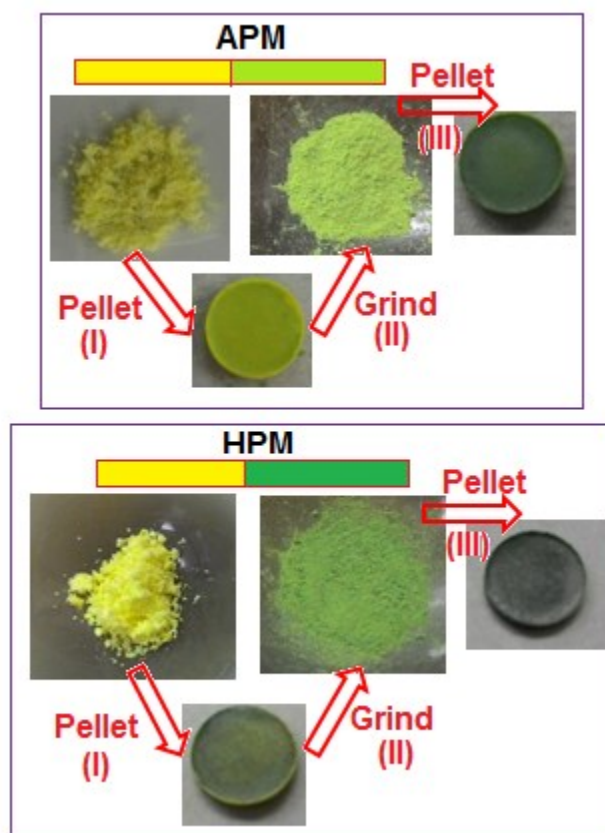

**Figure S4.** Pressure effect color changes (yellow to green) in APM and HPM materials.

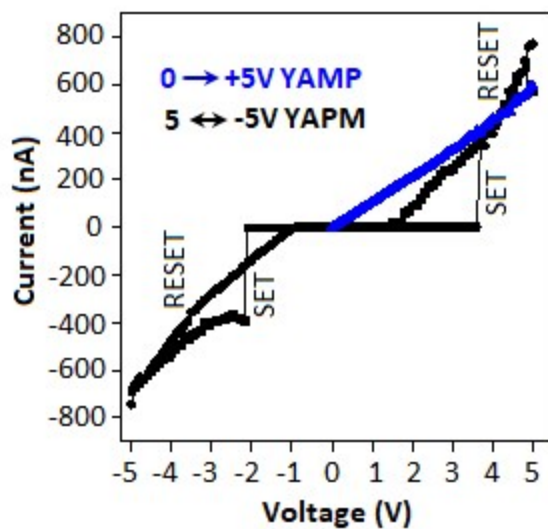

**Figure S5.** The current-voltage performance of the fabricated Au|YAPM|Au device plotted on a linear scale.

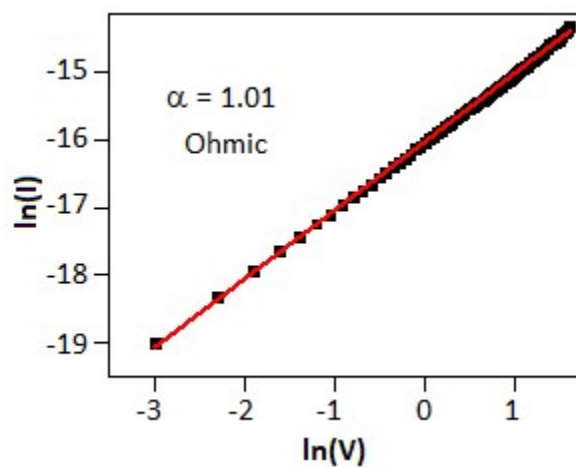

**Figure S6.** Current-voltage performance in forward bias (0 to 5V) condition of the fabricated Au|YAPM|Au device exhibited ohmic (slope  $\sim 1.01$ ) type of conduction process.
